# Supplementary material for: Preliminary experience with dosimetry, response and patient reported outcome after 177Lu-PSMA-617 therapy for metastatic castration-resistant prostate cancer
Source: PubMed Central journal article supplement (PMC5356905; doi:10.18632/oncotarget.12240), 2016-09-24
Supplement: oncotarget-08-3581-s001.pdf [file oncotarget-08-3581-s001.pdf]

# Preliminary experience with dosimetry, response and patient reported outcome after <sup>177</sup>Lu-PSMA-617 therapy for metastatic castration-resistant prostate cancer

## Supplementary Material

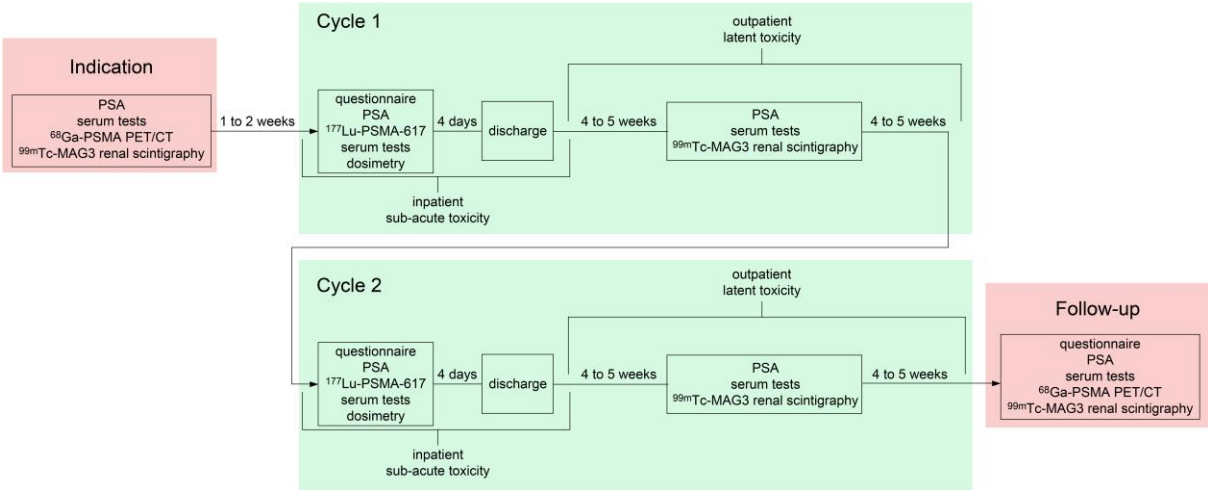

Supplemental Figure S1. Flow chart for <sup>177</sup>Lu-PSMA-617 RLT and follow-up.

**Supplemental Table 1. Response eight to ten weeks after the second cycle according to <sup>68</sup>Ga-PSMA PET and AP level**

| <b>Category</b> | <b>PET</b> | <b>AP</b> |
|-----------------|------------|-----------|
| PR              | 11 (73%)   | 2 (13%)   |
| SD              | 3 (20%)    | 7 (47%)   |
| PD              | 1 (7%)     | 5 (33%)   |

Abbreviations: SD, stable disease; PR, partial response; PD, progressive disease.

## **Response to RLT - Details**

PET response was determined by baseline to follow-up change in sum of  $SUV_{max}$  of all lesions (to a maximum of three lesions per organ). Based on PERCIST 1.0 [1], progressive disease (PD) was defined as 30% or greater increase in summed  $SUV_{max}$ , whereas partial response (PR) was defined as 30% or greater decrease in  $SUV_{max}$ .

## **References**

1. Wahl RL, Jacene H, Kasamon Y and Lodge MA. From RECIST to PERCIST: Evolving Considerations for PET response criteria in solid tumors. J Nucl Med. 2009; 50 Suppl 1:122S-150S.
